# Supplementary material for: Ultrastructural Location and Interactions of the Immunoglobulin Receptor Binding Sequence within Fibrillar Type I Collagen
Source: PubMed Central journal article supplement (PMC7312686; doi:10.3390/ijms21114166), 2020-06-11
Supplement: ijms-21-04166-s001.pdf [file ijms-21-04166-s001.pdf]

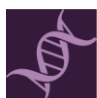

1 Article

2 **Supplementary Information**

3

4 **S1. P-values from one-way ANOVA and multiple comparisons on and between sample groups**

5 p-values from statistical analyses performed using one-way ANOVA and multiple comparisons  
6 between sample groups are presented in Table S1. More information on these statistics can be  
7 presented in Supplemental Information.

8 Table S1: p-values from statistical analyses performed on Young's Modulus and Adhesion Force, by  
9 sample and between sample groups.

|                 |         | One-way ANOVA | Multiple comparisons to native |       |       |
|-----------------|---------|---------------|--------------------------------|-------|-------|
|                 |         |               | 20min                          | 1h    | 2h    |
| Young's Modulus |         |               |                                |       |       |
|                 | Overlap | 0.187         | 0.136                          | 0.825 | 0.517 |
|                 | Gap     | 0.235         | 0.397                          | 0.159 | 0.049 |
| Adhesive Force  |         |               |                                |       |       |
|                 | Overlap | 0.000         | 0.001                          | 0.001 | 0.001 |
|                 | Gap     | 0.000         | 0.001                          | 0.001 | 0.001 |

10

11 **S2. Statistical analyses on the Young's modulus of the overlap region of the native and antibody-**  
12 **treated collagen fibrils**

13 *S2.1 One-way ANOVA*

Descriptives  
Young's Modulus of Overlap

|       | N   | Mean   | Std. Deviation | Std. Error | 95% Confidence Interval for Mean |             |
|-------|-----|--------|----------------|------------|----------------------------------|-------------|
|       |     |        |                |            | Lower Bound                      | Upper Bound |
| 0     | 40  | 1.1428 | .14000         | .02214     | 1.0980                           | 1.1875      |
| 20    | 40  | 1.1918 | .15040         | .02378     | 1.1436                           | 1.2399      |
| 60    | 40  | 1.1500 | .12009         | .01899     | 1.1116                           | 1.1884      |
| 120   | 40  | 1.1215 | .17027         | .02692     | 1.0670                           | 1.1760      |
| Total | 160 | 1.1515 | .14717         | .01163     | 1.1285                           | 1.1745      |

14

ANOVA  
Young's Modulus of Overlap

|                | Sum of Squares | df  | Mean Square | F     | Sig. |
|----------------|----------------|-----|-------------|-------|------|
| Between Groups | .104           | 3   | .035        | 1.619 | .187 |
| Within Groups  | 3.340          | 156 | .021        |       |      |
| Total          | 3.444          | 159 |             |       |      |

15

16 S2.2 Post Hoc Tests

Multiple Comparisons  
Young's Modulus of Overlap  
LSD

| (I) binding time | (J) binding time | Mean Difference (I-J) | Std. Error | Sig. | 95% Confidence Interval |             |
|------------------|------------------|-----------------------|------------|------|-------------------------|-------------|
|                  |                  |                       |            |      | Lower Bound             | Upper Bound |
| 0                | 20               | -.04900               | .03272     | .136 | -.1136                  | .0156       |
|                  | 60               | -.00725               | .03272     | .825 | -.0719                  | .0574       |
|                  | 120              | .02125                | .03272     | .517 | -.0434                  | .0859       |
| 20               | 0                | .04900                | .03272     | .136 | -.0156                  | .1136       |
|                  | 60               | .04175                | .03272     | .204 | -.0229                  | .1064       |
|                  | 120              | .07025*               | .03272     | .033 | .0056                   | .1349       |
| 60               | 0                | .00725                | .03272     | .825 | -.0574                  | .0719       |
|                  | 20               | -.04175               | .03272     | .204 | -.1064                  | .0229       |
|                  | 120              | .02850                | .03272     | .385 | -.0361                  | .0931       |
| 120              | 0                | -.02125               | .03272     | .517 | -.0859                  | .0434       |
|                  | 20               | -.07025*              | .03272     | .033 | -.1349                  | -.0056      |
|                  | 60               | -.02850               | .03272     | .385 | -.0931                  | .0361       |

\*. The mean difference is significant at the 0.05 level.

17

18 S3. Statistical analyses on the Young's modulus of the gap region of the native and antibody-  
19 treated collagen fibrils

20 S3.1 One-way ANOVA

Descriptives  
Young's Modulus of Gap

|       | N   | Mean   | Std. Deviation | Std. Error | 95% Confidence Interval for Mean |             |
|-------|-----|--------|----------------|------------|----------------------------------|-------------|
|       |     |        |                |            | Lower Bound                      | Upper Bound |
| 0     | 40  | 1.2200 | .15004         | .02372     | 1.1720                           | 1.2680      |
| 20    | 40  | 1.2503 | .16074         | .02542     | 1.1988                           | 1.3017      |
| 60    | 40  | 1.2705 | .13066         | .02066     | 1.2287                           | 1.3123      |
| 120   | 40  | 1.2908 | .19030         | .03009     | 1.2299                           | 1.3516      |
| Total | 160 | 1.2579 | .16005         | .01265     | 1.2329                           | 1.2829      |

21

ANOVA  
Young's Modulus of Gap

|                | Sum of Squares | df  | Mean Square | F     | Sig. |
|----------------|----------------|-----|-------------|-------|------|
| Between Groups | .109           | 3   | .036        | 1.434 | .235 |
| Within Groups  | 3.964          | 156 | .025        |       |      |
| Total          | 4.073          | 159 |             |       |      |

22

23

24

25

26 S3.2 Post Hoc Tests

Multiple Comparisons  
Young's Modulus of Gap  
LSD

| (I) binding time | (J) binding time | Mean Difference (I-J) | Std. Error | Sig. | 95% Confidence Interval |             |
|------------------|------------------|-----------------------|------------|------|-------------------------|-------------|
|                  |                  |                       |            |      | Lower Bound             | Upper Bound |
| 0                | 20               | -.03025               | .03564     | .397 | -.1007                  | .0402       |
|                  | 60               | -.05050               | .03564     | .159 | -.1209                  | .0199       |
|                  | 120              | -.07075*              | .03564     | .049 | -.1412                  | -.0003      |
| 20               | 0                | .03025                | .03564     | .397 | -.0402                  | .1007       |
|                  | 60               | -.02025               | .03564     | .571 | -.0907                  | .0502       |
|                  | 120              | -.04050               | .03564     | .258 | -.1109                  | .0299       |
| 60               | 0                | .05050                | .03564     | .159 | -.0199                  | .1209       |
|                  | 20               | .02025                | .03564     | .571 | -.0502                  | .0907       |
|                  | 120              | -.02025               | .03564     | .571 | -.0907                  | .0502       |
| 120              | 0                | .07075*               | .03564     | .049 | .0003                   | .1412       |
|                  | 20               | .04050                | .03564     | .258 | -.0299                  | .1109       |
|                  | 60               | .02025                | .03564     | .571 | -.0502                  | .0907       |

\*. The mean difference is significant at the 0.05 level.

27

28 **S4. Statistical analyses on the Adhesion force of the overlap region of the native and antibody-**  
29 **treated collagen fibrils**

30 S4.1 One-way ANOVA

Descriptives  
Adhesive Force of Overlap

|       | N   | Mean   | Std. Deviation | Std. Error | 95% Confidence Interval for Mean |             |
|-------|-----|--------|----------------|------------|----------------------------------|-------------|
|       |     |        |                |            | Lower Bound                      | Upper Bound |
| 0     | 40  | 4.5000 | .60000         | .09487     | 4.3081                           | 4.6919      |
| 20    | 40  | 5.3000 | .80224         | .12685     | 5.0434                           | 5.5566      |
| 60    | 40  | 6.7000 | .50230         | .07942     | 6.5394                           | 6.8606      |
| 120   | 40  | 8.2000 | .40064         | .06335     | 8.0719                           | 8.3281      |
| Total | 160 | 6.1750 | 1.53192        | .12111     | 5.9358                           | 6.4142      |

31

ANOVA  
Adhesive Force of Overlap

|                | Sum of Squares | df  | Mean Square | F       | Sig. |
|----------------|----------------|-----|-------------|---------|------|
| Between Groups | 317.900        | 3   | 105.967     | 299.254 | .000 |
| Within Groups  | 55.240         | 156 | .354        |         |      |
| Total          | 373.140        | 159 |             |         |      |

32

33

34

35

36 S4.2 Post Hoc Tests

Multiple Comparisons  
Adhesive Force of Overlap  
LSD

| (I) binding time | (J) binding time | Mean Difference (I-J) | Std. Error | Sig. | 95% Confidence Interval |             |
|------------------|------------------|-----------------------|------------|------|-------------------------|-------------|
|                  |                  |                       |            |      | Lower Bound             | Upper Bound |
| 0                | 20               | -.80000*              | .13306     | .000 | -1.0628                 | -.5372      |
|                  | 60               | -2.20000*             | .13306     | .000 | -2.4628                 | -1.9372     |
|                  | 120              | -3.70000*             | .13306     | .000 | -3.9628                 | -3.4372     |
| 20               | 0                | .80000*               | .13306     | .000 | .5372                   | 1.0628      |
|                  | 60               | -1.40000*             | .13306     | .000 | -1.6628                 | -1.1372     |
|                  | 120              | -2.90000*             | .13306     | .000 | -3.1628                 | -2.6372     |
| 60               | 0                | 2.20000*              | .13306     | .000 | 1.9372                  | 2.4628      |
|                  | 20               | 1.40000*              | .13306     | .000 | 1.1372                  | 1.6628      |
|                  | 120              | -1.50000*             | .13306     | .000 | -1.7628                 | -1.2372     |
| 120              | 0                | 3.70000*              | .13306     | .000 | 3.4372                  | 3.9628      |
|                  | 20               | 2.90000*              | .13306     | .000 | 2.6372                  | 3.1628      |
|                  | 60               | 1.50000*              | .13306     | .000 | 1.2372                  | 1.7628      |

\*. The mean difference is significant at the 0.05 level.

37

38 S5. Statistical analyses on the Adhesion force of the gap region of the native and antibody-  
39 treated collagen fibrils

40 S5.1 One-way ANOVA

Descriptives  
Adhesive Force of Gap

|       | N   | Mean   | Std. Deviation | Std. Error | 95% Confidence Interval for Mean |             |
|-------|-----|--------|----------------|------------|----------------------------------|-------------|
|       |     |        |                |            | Lower Bound                      | Upper Bound |
| 0     | 40  | 4.8000 | .60383         | .09547     | 4.6069                           | 4.9931      |
| 20    | 40  | 5.0000 | .70274         | .11111     | 4.7753                           | 5.2247      |
| 60    | 40  | 5.3000 | .40000         | .06325     | 5.1721                           | 5.4279      |
| 120   | 40  | 5.6000 | .20631         | .03262     | 5.5340                           | 5.6660      |
| Total | 160 | 5.1750 | .59389         | .04695     | 5.0823                           | 5.2677      |

41

42

ANOVA  
Adhesive Force of Gap

|                | Sum of Squares | df  | Mean Square | F      | Sig. |
|----------------|----------------|-----|-------------|--------|------|
| Between Groups | 14.700         | 3   | 4.900       | 18.473 | .000 |
| Within Groups  | 41.380         | 156 | .265        |        |      |
| Total          | 56.080         | 159 |             |        |      |

43

44

45 S5.2 Post Hoc Tests

Multiple Comparisons  
Adhesive Force of Gap  
LSD

| (I) binding time | (J) binding time | Mean Difference (I-J) | Std. Error | Sig. | 95% Confidence Interval |             |
|------------------|------------------|-----------------------|------------|------|-------------------------|-------------|
|                  |                  |                       |            |      | Lower Bound             | Upper Bound |
| 0                | 20               | -.20000               | .11516     | .084 | -.4275                  | .0275       |
|                  | 60               | -.50000*              | .11516     | .000 | -.7275                  | -.2725      |
|                  | 120              | -.80000*              | .11516     | .000 | -1.0275                 | -.5725      |
| 20               | 0                | .20000                | .11516     | .084 | -.0275                  | .4275       |
|                  | 60               | -.30000*              | .11516     | .010 | -.5275                  | -.0725      |
|                  | 120              | -.60000*              | .11516     | .000 | -.8275                  | -.3725      |
| 60               | 0                | .50000*               | .11516     | .000 | .2725                   | .7275       |
|                  | 20               | .30000*               | .11516     | .010 | .0725                   | .5275       |
|                  | 120              | -.30000*              | .11516     | .010 | -.5275                  | -.0725      |
| 120              | 0                | .80000*               | .11516     | .000 | .5725                   | 1.0275      |
|                  | 20               | .60000*               | .11516     | .000 | .3725                   | .8275       |
|                  | 60               | .30000*               | .11516     | .010 | .0725                   | .5275       |

\*. The mean difference is significant at the 0.05 level.
